# Supplementary material
Source: publisher site journal article supplement (https://www.dovepress.com/article/380293)
Supplement: Supplementary file 1 [file get_supplementary_file.php]

# 1 **Supplementary A: Interview guide**

## 2 ***MDTM preparation***

3 First, I would like to know more about the preparation of the MDTMs. Could you briefly describe how  
4 you prepare yourself for the MDTM?

5 Who registers the patient for the MDTM list?

6 What criteria determine whether a patient is put on the MDTM list?

7 When is the patient information complete enough to be discussed at the MDTM?

8 Who prepares the documentation of the MDTM discussions?

9 How much time do you spend on the preparation of the MDTM?

10 How do you experience this preparation?

11 How do you think the preparation process could be improved?

12

## 13 ***MDTM process***

14 During the MDTM different topics are being discussed. What kind of questions are generally asked  
15 and does this influence the discussion order of patients?

16 Is there a designated chair person of the MDTM?

17

18 What do you think about the time management regarding the discussion of patients? Are there  
19 instances discussions are too long or too short?

20 Is there enough time to discuss your specific discipline during patient discussions?

21 Do you feel like enough time is spent on your specialism?

22

23 Is there a way to avoid having to postpone patient discussions due to missing diagnostic information  
24 for example?

25 Which factors do you think determine a successful MDTM and why?

26 How is the efficiency of a MDTM determined?

27

## 28 ***Improvement points?***

29 What bottleneck can you think of regarding breast cancer MDTMs in general?

30 What are factors that cause delays during the MDTMs?

31 What way could time gain be accomplished during MDTMs?

32 Which aspects of current MDTM organization should be improved?

33
